# Supplementary material
Source: PubMed Central journal article supplement (PMC4107548)

# RESEARCH REPORTS

## Biological

A. Letra<sup>1,2\*†</sup>, M. Zhao<sup>1†</sup>, R.M. Silva<sup>1,2</sup>,  
A.R. Vieira<sup>3</sup>, and J.T. Hecht<sup>1,2</sup>

<sup>1</sup>Craniofacial Research Center, University of Texas Health Science Center at Houston School of Dentistry, Houston, TX, USA; <sup>2</sup>Department of Pediatrics, Pediatric Research Center, University of Texas Health Science Center Medical School at Houston, Houston, TX, USA; and <sup>3</sup>Departments of Oral Biology and Pediatric Dentistry, University of Pittsburgh School of Dental Medicine, Pittsburgh, PA, USA; <sup>†</sup>joint first authors; <sup>\*</sup>corresponding author, [aradne.m.letra@uth.tmc.edu](mailto:aradne.m.letra@uth.tmc.edu)

*J Dent Res* DOI: 10.1177/0022034514534444

### APPENDIX

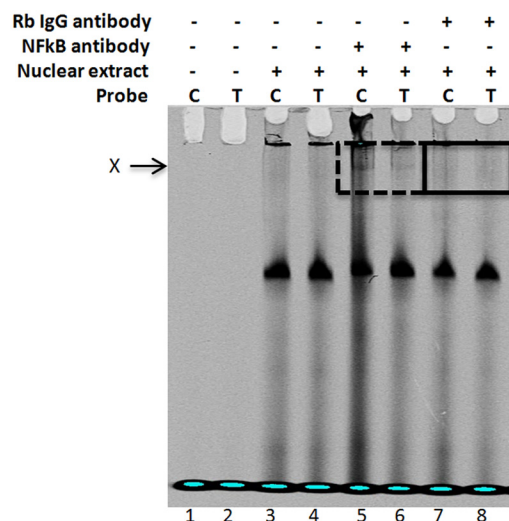

**Appendix Figure.** Electrophoretic mobility shift assays and supershift assays of *TIMP2* rs8179096. Double-stranded, infrared-labeled C and T probes incubated in the absence (lanes 1, 2) or presence of cell nuclear extract (lanes 3-8). NFκB antibody was added in lanes 5 and 6 for supershift assay (in dotted frame). Rabbit IgG antibody was added in lanes 7 and 8 as isotype control.

### MATERIALS & METHODS

#### Reporter Constructs

Constructs and reagents were purchased from SwitchGear Genomics (Menlo Park, CA, USA). A reporter construct showing 1.057 kilobases of the *MMP3* gene promoter containing the rs522616 A/G variant was generated for the A allele and used for site-directed mutagenesis to obtain the G allele (constructs *MMP3\_A* and *MMP3\_G*). Next, reporter constructs containing the rs522616 A/G and rs3025058 5A/6A variant alleles combined were generated by cloning the promoter segments from -2074 kilobases upstream to the transcription start site, into a

# Functional Significance of *MMP3* and *TIMP2* Polymorphisms in Cleft Lip/Palate

pLightSwitch\_Prom vector (SwitchGear Genomics, Carlsbad, CA, USA). Constructs were generated with the ancestral alleles; alternate alleles were obtained by site-directed mutagenesis (constructs *MMP3\_5A\_A*, *MMP3\_5A\_G*, *MMP3\_6A\_A*, and *MMP3\_6A\_G*). Reporter constructs for the *TIMP2* rs8179096 C/T variant were generated showing a 0.979-kilobase pair of the gene promoter (constructs *TIMP2\_C* and *TIMP2\_T*). Insert sequences are presented below. Cloning efficiency for all constructs was verified by direct sequencing. GenBank sequences for *MMP3* (NG\_012100.1) and *TIMP2* (NC\_000017.10) genes were used as references.

#### Reporter Constructs Insert Sequences and Respective Blasting Results, per the NCBI Database

Sequence of inserts for *MMP3* rs3025058 5A[6A]/rs522616 A[G] (base changes in bold): TGACTCTCCTGGGAC TTGGGAAACATCTTT CAGGGAAAGTCGT CGAA GCTGTTTTAAATATAGCAAACCTTTGTATTTAGTTCAG GAACAGCATGGCCATTTTGCCAATCACATCTTAACAG TTGGAAGCAACATATTATCTATCAGGCTTTCCTCT AAACCTTTAAATATGTTTTATAAGTTATAACTCCAGAGAA AATTTACAAAGGATAAACCTTAATATAGAAGGAATTA GAGCTGCCACAGCTTCTACACTTTTAACTCTCAATAT TTTATCTGTTGGGCTCCACTGTTTCTTCTGGAATTCAC ATCACTGCCACCACTCTGTTCTCCTTGTCCTCATATCA ATGTGGCCAAATATTTCCCTGTATTTCAATCAGGACAA GACATGGT**TTTTT**[T]CCCCCATCAAAGGAATGGAGAA CCATAGAATACTAGTTTTAAATGTCTTTAGGCCAGGT GCCGTGACCCATGCTGTGTAATCCTAGCAGCTTTGAGAGG TTGAGGCAGGAGAATCACTTGAGCCAGAGCTCGAA ACCAGCCTGGGCAACATAGTGAACCTCTGTCTCTATT TTTAAATAAAATTTGAAAAAGTCTTTAGACATAATCTA GTCTAAAAATGAAGGCTTAAATGTGATGTATAGCCCC TGCCAAGTGCTATCAACTGTGTGGGCATCTTCAGTCA TAGGGATCTTATTGCCACAGAGAAATCCCTTAAACTT ATTGGGTAAAATCTCTCCAATGTTTATTAAGAAACACA CAAAAATAAAGCAAAGAAGAAAATGCAAAAAGAGTT ATAAATGAGAGGAAGCAAATGGGCACTTATTAAGG TCTAATAAATGCACATTTGTATCCATCATTCTACTGAGT

TCTTACTCCCAAGATGTTCTTCCCTTTAGCAAACAAT  
 AAGCAAGTCAGCAAAGAAAGAAAGAAACAACAAT  
 GTGGTGATCAGGGAAGCATTGAGGAGATGGATGGTG  
 GCAGGTGGCAAGAGGACTATAAAAGTTTACAAAATG  
 TCTTCTCTGAATATGTTTAGAGTCTTGCATTCAAGCAT  
 TTATTATACACCAATAATGTGAGCAACACTTTACTTGAC  
 AAAGAAACAGAAAAGAAAGAAAGAAAGAAACAAG  
 AAGAGCATGAAGAGAAAATTTAGGATGGATTCTGTTT  
 TCAACTTCAAAGCATCTGCTAATTTGAATTTAGGGAG  
 GAGGGGAAAAGGTTGAAAGAGAATAAGACATGTGTA  
 GAAGACAAGGACAGAGAGAATTTAGTCCGGTAAGC  
 AATGTAATTCATTTCAA[G]TTCTACAACACTATTTATGGAG  
 CAGCTACGTGGGCCCATCACCCATTAATAAATTGGTTA  
 CAGAATTAACAACCAACCAAGGGAATATACTTCCTT  
 CTTTTTACAGACCCTCTTTGTTCTATTCTGCCCATGA  
 GGTTTTCTCCTCAAGAACCAGCAAATCCAACGACAG  
 TCAATAGCAGGCATTACAAATCAGATTCAGAAAA  
 TAAATCACCCCTTCTAAATTTCTTCTAGATATTATCTT  
 TTATGTTTTGAGTATAATTGTATATAGTATAGACTATAGC  
 TATGTATGTACACTTTCCACTTACATCTTTATTTGCTTT  
 TATAATGTGTTTCTTAAATAAAACTGCTTTTAGAAGTT  
 CTGCACAATTCTGATTTTACCAAGTCAACACTACTTCTT  
 CTCTCAAAGGACAAACATAAATTGTCTAGTGAATTC  
 AGTCAATTTTCCAGAAGAAAAAATGCTCCAGTTT  
 CTCCTACTACCAAGACAGAAAGCACTTCTGGAGATTA  
 ATCACTGTGTTGCCTTGCAAAATTGGGAAGGTTGAGA  
 GAAATTAGTAAAGTAGGTTGTATCATCCTACTTTGAATT  
 TGAATGTTTGGAAATGGTCTGCTGCCATTTGGATGA  
 AAGCAAGGATGAGTCAAGCTGCGGGTGATCCAACAA  
 ACACTGTCACTCTTTAAAGCTGCGCTCCCGAGGTTG  
 GACCTACAAGGAGGCAGGCAAGACAGCAAGGCATAG  
 AGACAACATAGAGCTAAGTAAAGCCAGTGGAA

CAAAGAAACAGAAAAGAAAGGAAAGGAAGAAAACA  
 GAAGAGCATGAAGAGAAAATTTAGGATGGATTCTGTT  
 CTTCAACTTCAAAGCATCTGCTAATTTGAATTTAGGGA  
 GGAGGGGAAAAGGTTGAAAGAGAATAAGACATGTGT  
 AGAAGACAAGGACAGAGAGAATTTAGTCCGGTAAG  
 CAATGTAATTCATTTCAA[G]TTCTACAACACTATTTATGGA  
 GCAGCTACGTGGGCCCATCACCCATTAATAAATTGGTT  
 ACAGAATTAACAACCAACCAAGGGAATATACTTCCTT  
 CTTTTTACAGACCCTCTTTGTTCTATTCTGCCCATGAG  
 GTTTTCTCCTCAAGAACCAGCAAATCCAACGACAGT  
 CAATAGCAGGCATTACAAATCAGATTCAGAAAAATAAA  
 TCACCCCTTCTAAATTTCTTCTAGATATTATCTTTATGT  
 TTTGAGTATAATTGTATATAGTATAGACTATAGCTATGTA  
 TGTACACTTTCCACTTACATCTTTATTTGCTTTTATAAT  
 GTGTTTCTTAAATAAAACTGCTTTTAGAAGTTCTGCA  
 CAATTCTGATTTTACCAAGTCAACCTACTTCTTCTCTC  
 AAAAGGACAAACATAAATTTGTCTAGTGAATTCCAGTC  
 AATTTTTCCAGAAGAAAAAATGCTCCAGTTTTCTCC  
 TCTACCAAGACAGGAAGCACTTCTGGAGATTAATCA  
 CTGTGTTGCCTTGCAAAATTGGGAAGGTTGAGAGAAA  
 TTAGTAAAGTAGGTTGTATCATCCTACTTTGAATTTGGA  
 ATGTTTGGAAATGGTCTGCTGCCATTTGGATGAAAGC  
 AAGGATGAGTCAAGCTGCGGGTGATCCAACAACAAC  
 TGTCACCTTTAAAGCTGCGCTCCCGAGGTTGGACCT  
 ACAAGGAGCAGGCAAGACAGCAAGGCATAGAGACA

**Result of Inserts MMP3 rs3025058 5A[6A]/rs522616 A[G] Blasted to the Human Genome, per the NCBI Database**

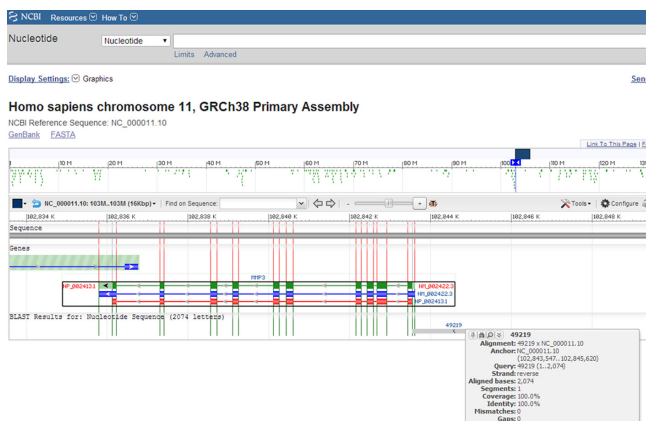

**Sequence of Inserts for MMP3 rs522616 A[G] (base changes in bold):**

GCAGGTGGCAAGAGGACTATAAAAGTTTACAAAATG  
 TCTTCTCTGAATATGTTTAGAGTCTTGCATTCAAGCAT  
 TTATTATACACCAATAATGTGAGCAACACTTTACTTGA

**Result of Inserts MMP3 rs522616 A[G] Blasted to the Human Genome, per the NCBI Database**

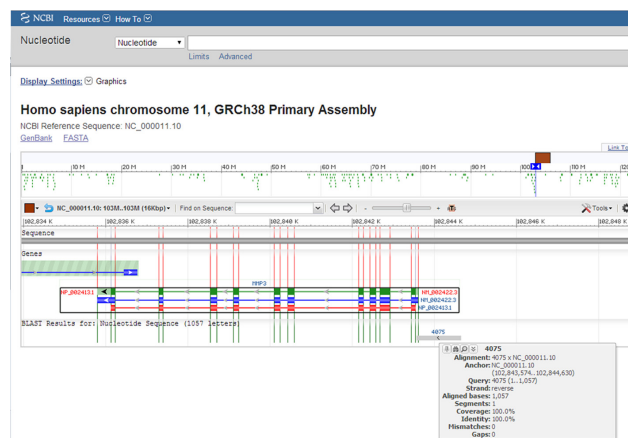

**Sequence of Inserts for TIMP2 rs8179096 C[T] (base changes in bold):**

TCACCACCCTACACATGTTTCATCCCTTCATATGCCTGGG  
 TCTTTCTGGAACACAAAAGTGTGTTTGGGAAAAGTCC  
 TTCGGCTCCCACATTTGTGGACTAAGAGAGGAAAAGT  
 TGAGCGGAACCCAGCCAATGCCTCTGCTGCGATCCTA  
 CTGGCTCCTGGGCGCTGGGCCACCCCGTCTCTTGT  
 TGGCTGGTCAAAAATATGGCCAGTTTATATAAAATCCT  
 GTTTTGTTCACAGTAACCACACCCCCACCCCAACT  
 AAAGTGGCCAGGCGCACTTAAATTTCTAAGGCCTCCA  
 TTTGAAAAGGGATCCTGTCAGTTTCTCAATAGGCCA  
 CCCGCCACAGAAACGGGGAGGTGGCGACAGGGAAC  
 GCCCCGTCTCAAAGGACACCCCTTGGCTCGCCCCG

AGGCTGGGCTCGAAGGGACCCCGGGTGGCGGGGA  
 CGGAGCAGCGTAGCCCTCCAGAGTCGAGCTGAAGG  
 GAAAGGGTAGCGGGTGGGTCGCCTGGTGTCTGGAAG  
 AACGGGGCGCAGTCCCCCGCGCTGAGTCAGGGACC  
 CCGGGCGCAGAAGGCCACGCAGCGGGGACCGGGGTC  
 GGGGGCTGGGGGCGTCCGGGGACCCCGCGCGGGT  
 GCGGGTCGCGGGCGCCAGGTGGTGC[T]GGGAAGCC  
 CCGACGTGCCAGGCCGGGCACAACAAAAGCGCGGGC  
 TGGGGGAGGCGCGGGCGGAGGGGGAGGAGGGGGC  
 TGCTGGGAGCGCCAGAGCTGCATTGGCCGCCAGCC  
 ACCGGGAGGAGGAGCAGAAAATCCTCCGAGCGCAATA  
 AAAGTGCAGCCCGCCCAAGCCCGCAGCAAAACACATC  
 CGTAGAAGGCAGCGCGGCCGCCGAGAACCAGCGCGC  
 CGCTCGCCCGCCGCCCCACCCCGCCGCCCGCCCG  
 GCGAATTGCGCCCGCGCCCTCCCTCGCGCCCCG  
 AGACAAAGAGGAGAGAAAGTTTGCG

**Results of Inserts TIMP2 rs8179096 C[T] Blasted to the Human Genome, per the NCBI Database**

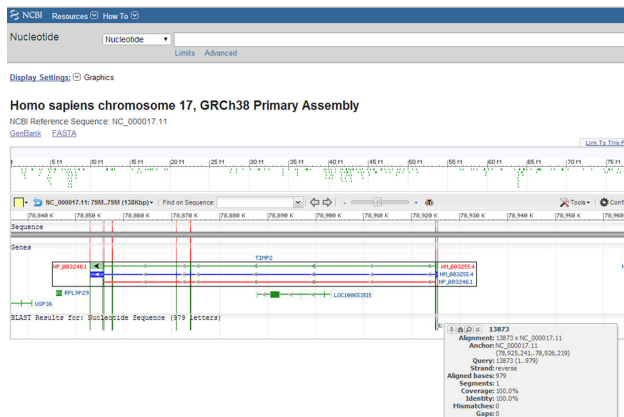

**Appendix Table. Oligonucleotide Sequences for EMSAs**

| Oligonucleotide                        | Sequence                          |
|----------------------------------------|-----------------------------------|
| MMP3 rs522616 A                        | TCATTCA[A]TCTACAA                 |
| MMP3 rs522616 G                        | TCATTCA[G]TCTACAA                 |
| TIMP2 rs8179096 C                      | CAGGTGGTG[C]GGGAAGCC              |
| TIMP2 rs8179096 T                      | CAGGTGGTG[T]GGGAAGCC              |
| NFκB consensus oligonucleotide         | AGTTGAG <b>GGGACTTCCC</b> AGGC*   |
| Mutated NFκB consensus oligonucleotide | AGTTGAG <b>GGCACITTTCCC</b> AGGC* |

\*Bolted nucleotides represent binding site to NFκB protein.

**EMSA for Verification of NFκB Binding to TIMP2 rs8179096**

To further confirm that C/T probe binds to NFκB protein, we performed additional EMSA experiments using wild-type or mutant NFκB consensus-binding oligonucleotide. Double-stranded, infrared-labeled C and T probes were incubated in the absence (lanes 1, 2) or presence of cell nuclear extract (lanes 3-12). One- or two-fold molar excess (in comparison with probe concentration) of NFκB consensus-unlabeled oligonucleotide and mutant NFκB consensus-unlabeled oligonucleotide was added in the reaction as competitors.

**Proteins Identified by Mass Spectrometry Analyses for MMP3 rs522616 A Allele**

The following figures reflect the proteins identified as exclusively bound to rs522616 A, showing over 95% probability levels (in green). The last 2 columns (blank) show that these 34 proteins were not found bound to the G allele or to a negative control band.

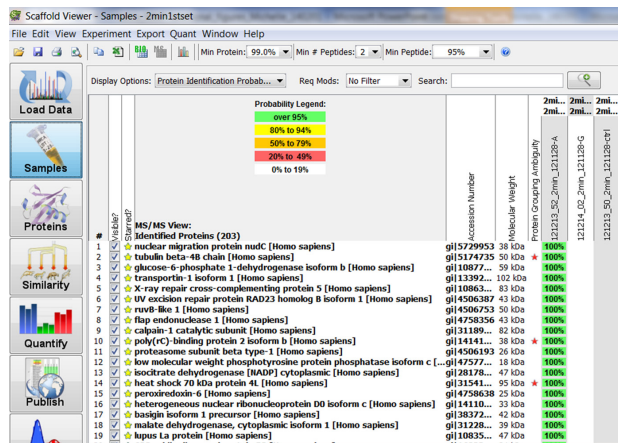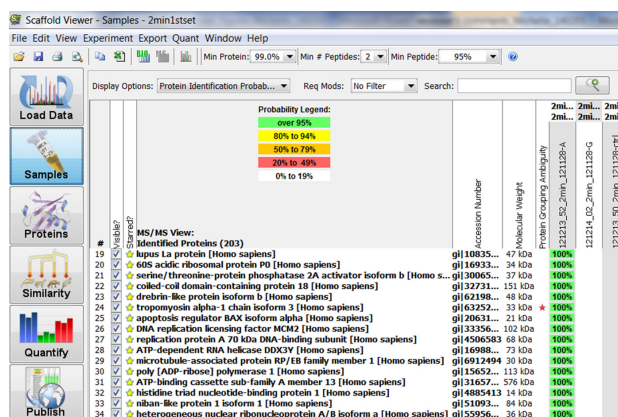

Supplement: DS_10.1177_0022034514534444.pdf [file DS_10.1177_0022034514534444.pdf]
